# Supplementary material for: LINE-1 and SINE-B1 mapping and genome diversification in Proechimys species (Rodentia: Echimyidae)
Source: Life Sci Alliance. 2022 Mar 18;5(6):e202101104. doi: 10.26508/lsa.202101104 (PMC8932440; doi:10.26508/lsa.202101104)
Supplement: Supplementary file 4 [file LSA-2021-01104_TableS1.xlsx]

## Sheet: Planilha1
Supporting Information
Table S1
Basic data matrix for LINE-1. Number of characters: 19. Number of informative characters: 19.
	Characters	PS1	PG	PS2	PE	PL	PC
1	Assoc. 1m/10a+18m+15a+4a	1	0	1	0	0	1
2	Assoc. 7a+9a+14a/12m+6sm+18a+14a+16a /11a+10a+5a+16a /8m+10m+4sm /1m/ 11m+10a+6sm+12m	1	1	1	1	1	1
3	Assoc. 1m/3m / 6st+5sm/9a+10m+6m/5m	1	0	1	1	1	1
4	Assoc. 3a/12m+3st/1st/7m+3a	1	1	1	1	0	1
5	Assoc. 17a+12m+13m/11m+ 12m+3a/2st	1	0	0	0	1	1
6	Assoc. 2a/5m+8m+10a /14a+7a+12m	1	1	1	0	0	0
7	Assoc. 20a+16a/11a+2a/2sm/2st/9sm+8a	1	1	0	1	1	1
8	Assoc. 19a+6a/2st /1sm/5m	1	0	1	1	1	1
9	Assoc. 8a/3st	1	0	1	0	0	0
10	Assoc. 5a/4sm/4m	1	0	0	0	1	1
11	Assoc. 4m/8sm	0	1	0	0	1	0
12	Assoc. 7a/4sm/7a	0	1	1	1	0	0
13	Assoc. 21a/9m/11m/7m/17a	1	0	1	1	1	1
14	Assoc. 11sm/15m/13a/9m	1	1	1	1	0	0
15	Assoc. 17a/14m+15m	0	0	1	1	0	0
16	Assoc. 22a/13m	1	1	0	0	0	0
17	Assoc. 21a/15a	1	0	1	0	0	0
18	Assoc. 19a/18m/13a	0	1	1	0	1	0
19	Assoc. 13m/13m	0	0	0	1	0	1
PS1 = P. guyannensis (2n=46), PG = P. gardneri (2n=40), PS2 = P. guyannensis (2n=38), PE = Pechinothrix
echinothrix (2n=32), PL = P. longicaudatus (2n=28), PC = P. cuvieri (2n=28), m = metacentric, sm
= submetacentric, st = subtelocentric, a = acrocentric
